# Supplementary material
Source: MDPI journal article supplement (https://www.mdpi.com/2077-0472/8/3/32)
Supplement: s1 [file s1]

## Sheet: Table S1
Table S1
			Zinc Applied						Zinc Concentration
	Year	Variety	(mg/L)	Reps	Fresh Weight (g)		Dry Weight (g)		(mg/g DW)
					mean	SE	mean	SE	mean	SE
Cabbage	2012	Bison F1	0	2	31.555	15.105	4.455	2.835	0.0336863	0.00149637
	2012	Bison F1	0.075	3	21.8767	3.97257	2.40667	0.567754	0.0459074	0.00650011
	2012	Bison F1	0.15	0
	2012	Bison F1	1.5	2	34.055	6.585	4.005	1.125	0.049793	0.00526063
	2012	Bison F1	150	3	49.92	11.6806	5.74333	1.76131	1.74056	0.290113
	2012	Bison F1	3000	0
	2012	Cape Horn F1	0	3	51.8667	9.29001	7.76333	2.00842	0.0481996	0.0169873
	2012	Cape Horn F1	0.075	2	37.995	0.185	4.655	0.245	0.0378292	0.00584255
	2012	Cape Horn F1	0.15	2	42.265	10.635	5.535	2.325	0.0714306	0.0343493
	2012	Cape Horn F1	1.5	3	35.9767	12.741	5.03667	1.9428	0.0345027	0.00697756
	2012	Cape Horn F1	150	2	82.44	1.14	14.685	0.015	0.928429	0.0982749
	2012	Cape Horn F1	3000	0
	2012	Elisa F1	0	0
	2012	Elisa F1	0.075	1	51.15		8.26		0.0403834
	2012	Elisa F1	0.15	0
	2012	Elisa F1	1.5	0
	2012	Elisa F1	150	1	63.82		9.81		1.15112
	2012	Elisa F1	3000	0
	2012	Red Drumhead	0	0
	2012	Red Drumhead	0.075	1	36.59		2.52		0.0596687
	2012	Red Drumhead	0.15	2	29.24	4.26	4.13	0.84	0.0549499	0.000506205
	2012	Red Drumhead	1.5	1	31.22		3.4		0.0566055
	2012	Red Drumhead	150	2	47.04	12.3	5.905	1.345	1.13745	0.127382
	2012	Red Drumhead	3000	0
	2013	Bison F1	0	3	23	1.15209	2.76	0.245153	0.0571425	0.00804738
	2013	Bison F1	0.15	3	25.1	3.03788	3.01333	0.389244	0.0546615	0.0058154
	2013	Bison F1	150	3	14.43	1.68111	1.71	0.191398	1.65311	0.0122733
	2013	Bison F1	500	3	0.71	0.217332	0.106667	0.0392994	5.02825	0.622414
	2013	Bison F1	1000	0
	2013	Bison F1	1500	0
	2013	Cape Horn F1	0	3	24.5533	2.11351	3.14	0.152753	0.0682254	0.00340604
	2013	Cape Horn F1	0.15	2	20.775	3.365	2.685	0.425	0.0551084	0.0125495
	2013	Cape Horn F1	150	3	29.4033	2.24773	3.99333	0.384289	1.36438	0.0870913
	2013	Cape Horn F1	500	3	1.33667	0.0895048	0.2	0.0264575	4.27463	0.162433
	2013	Cape Horn F1	1000	0
	2013	Cape Horn F1	1500	0
	2013	Red Drumhead	0	2	11.7	1.23	1.65	0.05	0.0667122	0.022395
	2013	Red Drumhead	0.15	1	1.02		0.11		0.184054
	2013	Red Drumhead	150	2	4.55	0.36	0.515	0.005	2.15173	0.503146
	2013	Red Drumhead	500	0
	2013	Red Drumhead	1000	0
	2013	Red Drumhead	1500	0
	2013	Tundra F1	0	3	20.3133	3.38237	3.09333	0.479386	0.226204	0.128725
	2013	Tundra F1	0.15	3	21.2067	2.49739	3.39667	0.140515	0.0826323	0.0045516
	2013	Tundra F1	150	3	34.7667	2.49155	5.16	0.273008	1.05168	0.0258783
	2013	Tundra F1	500	3	12.1	3.45156	1.84	0.579339	3.7359	0.263405
	2013	Tundra F1	1000	0
	2013	Tundra F1	1500	0
	2014	Bison F1	0	10	17.446	1.40172	1.241	0.149633	0.0449694	0.00314444
	2014	Bison F1	1.5	10	15.782	1.11056	1.037	0.118641	0.0424118	0.00162412
	2014	Bison F1	15	10	18.142	1.47866	1.25	0.176377	0.111379	0.00383006
	2014	Bison F1	150	10	14.055	1.03743	0.989	0.115397	1.03745	0.0280878
	2014	Bison F1	300	10	5.182	0.737736	0.387	0.0856615	1.97621	0.0700387
	2014	Bison F1	450	10	1.648	0.300817	0.193	0.0346747	2.54782	0.118734
	2014	Cape Horn F1	0	3	11.41	10.4104	1.03	0.94511	0.136014	0.0670065
	2014	Cape Horn F1	1.5	10	25.123	1.58304	2.324	0.190789	0.0484731	0.00267943
	2014	Cape Horn F1	15	10	23.081	1.87001	2.28	0.222206	0.108258	0.00691475
	2014	Cape Horn F1	150	10	20.552	1.67667	1.836	0.222487	0.96333	0.0463411
	2014	Cape Horn F1	300	5	8.64	1.72752	0.778	0.12627	1.60393	0.0925385
	2014	Cape Horn F1	450	2	1.25	0.25	0.125	0.015	1.68231	0.102587
	2014	Red Drumhead	0	10	20.102	1.3287	1.67	0.183333	0.0519971	0.00433731
	2014	Red Drumhead	1.5	8	20.325	2.26754	1.56125	0.264254	0.0508826	0.00241208
	2014	Red Drumhead	15	10	15.6	1.89568	1.124	0.186137	0.121651	0.00682199
	2014	Red Drumhead	150	10	3.38	0.843906	0.322	0.0777717	1.16455	0.0679321
	2014	Red Drumhead	300	10	4.615	0.782643	0.5	0.090111	1.66139	0.0790572
	2014	Red Drumhead	450	10	2.866	0.54725	0.324	0.0476608	2.03402	0.1057
	2014	Tundra F1	0	10	15.92	1.18228	1.665	0.209429	0.0436535	0.00262664
	2014	Tundra F1	1.5	10	16.552	1.59171	1.854	0.184326	0.044882	0.00310594
	2014	Tundra F1	15	10	15.119	1.08732	1.333	0.127576	0.0894825	0.0032988
	2014	Tundra F1	150	10	19.171	1.94742	1.946	0.271536	0.578997	0.0266593
	2014	Tundra F1	300	10	14.729	1.28263	1.31	0.102426	1.36729	0.0248566
	2014	Tundra F1	450	10	13.321	1.03889	1.265	0.105791	2.13858	0.112036
Broccoli	2015	Belstar	0	10	61.099	7.08484	11.302	1.34585	0.0354495	0.00332377
	2015	Belstar	1.5	9	57.2211	2.94534	11.1022	0.743142	0.0327044	0.00241968
	2015	Belstar	15	10	56.59	1.94353	11.586	0.649638	0.0940449	0.00410627
	2015	Belstar	150	10	19.251	4.87694	1.805	0.716109	0.623374	0.0603863
	2015	Belstar	300	4	4.9625	2.63015	0.195	0.195	2.06019	0.470124
	2015	Belstar	450	3	1.15	0.238607	0	0	3.26495	0.880005
	2015	Chevalier	0	10	62.972	2.64687	11.249	0.616458	0.0289274	0.00236246
	2015	Chevalier	1.5	10	57.701	2.68868	10.472	0.651816	0.0382025	0.0031628
	2015	Chevalier	15	10	57.353	5.91953	10.445	1.16022	0.0763713	0.00846258
	2015	Chevalier	150	9	19.1756	7.41012	1.67333	0.868183	0.698359	0.0794733
	2015	Chevalier	300	6	5.00167	2.8986	0.216667	0.197343	1.59861	0.333906
	2015	Chevalier	450	4	0.7475	0.162346	0	0	4.66198	0.594301
	2015	Marathon F1	0	10	61.348	3.3323	10.995	0.605253	0.0326218	0.00173353
	2015	Marathon F1	1.5	10	65.452	2.01391	11.939	0.466918	0.0289878	0.00342407
	2015	Marathon F1	15	10	69.868	2.02255	12.684	0.59309	0.0880161	0.00356967
	2015	Marathon F1	150	9	7.04222	2.19904	0.257778	0.169146	0.708457	0.0886109
	2015	Marathon F1	300	6	2.66167	0.861307	0	0	1.5457	0.187786
	2015	Marathon F1	450	7	0.952857	0.0490245	0	0	4.19542	0.409953
	2015	Waltham 29	0	10	58.325	3.05949	9.268	0.481749	0.027811	0.00373021
	2015	Waltham 29	1.5	10	58.94	2.64494	9.999	0.605369	0.0449153	0.00639503
	2015	Waltham 29	15	10	55.665	3.15775	8.941	0.695104	0.0879213	0.00781804
	2015	Waltham 29	150	9	6.18556	1.33134	0.162222	0.154819	0.681112	0.066197
	2015	Waltham 29	300	6	0.996667	0.183805	0	0	2.1734	0.306721
	2015	Waltham 29	450	2	0.77	0.04	0	0	4.8	0.931599
	2016	Belstar	0	10	23.088	4.28007	3.03	0.618956	0.0506005	0.00406362
	2016	Belstar	1.5	10	22.152	2.46072	2.671	0.242035	0.0573246	0.010135
	2016	Belstar	15	10	24.836	2.67091	3.613	0.387095	0.101395	0.0126571
	2016	Belstar	150	10	22.409	3.20883	2.803	0.383916	1.08371	0.0802603
	2016	Belstar	300	10	8.356	1.48546	1.069	0.167269	1.76899	0.0603461
	2016	Belstar	450	10	2.254	0.545581	0.332	0.0969971	2.56896	0.0983112
	2016	Chevalier	0	10	25.104	2.53518	3.708	0.370794	0.0522063	0.00381457
	2016	Chevalier	1.5	10	20.66	3.46602	3.024	0.559554	0.0559959	0.00589003
	2016	Chevalier	15	10	30.085	2.05891	4.286	0.265184	0.109607	0.00787442
	2016	Chevalier	150	10	23.39	3.78908	3.03	0.516129	1.07844	0.0431414
	2016	Chevalier	300	9	4.88667	0.632813	0.658889	0.0967161	1.85719	0.0862718
	2016	Chevalier	450	10	2.403	0.735311	0.328	0.121644	2.56478	0.127848
	2016	Marathon F1	0	9	28.439	2.81476	4.503	0.474383	0.0395409	0.00368885
	2016	Marathon F1	1.5	9	26.5856	2.89206	3.75111	0.542741	0.0403193	0.00513371
	2016	Marathon F1	15	9	24.254	2.86609	3.411	0.397313	0.110766	0.0140436
	2016	Marathon F1	150	9	18.426	3.66134	2.165	0.43179	1.09098	0.097063
	2016	Marathon F1	300	9	8.14889	2.65003	1.04111	0.292363	2.1286	0.138165
	2016	Marathon F1	450	10	2.118	0.709879	0.298	0.110893	2.52267	0.158977
	2016	Waltham 29	0	9	23.5411	4.40156	2.99222	0.567159	0.0361256	0.00321954
	2016	Waltham 29	1.5	10	24.541	4.09387	3.014	0.519911	0.0450712	0.0112649
	2016	Waltham 29	15	10	26.619	3.18951	3.686	0.468096	0.0708551	0.0092464
	2016	Waltham 29	150	10	16.098	3.4923	2.152	0.398633	0.944163	0.0977944
	2016	Waltham 29	300	9	4.92778	2.2659	0.643333	0.305491	1.9243	0.167459
	2016	Waltham 29	450	9	1.49	0.701005	0.224444	0.117321	2.87323	0.25702
	2017	Belstar	0	10	29.578	4.73145	5.41	0.858295	0.0615667	0.0237309
	2017	Belstar	1.5	7	28.6171	6.21309	5.36286	1.34567	0.037752	0.003294
	2017	Belstar	15	10	27.452	4.09982	4.839	0.790074	0.0780132	0.00816791
	2017	Belstar	150	10	34.987	2.66902	6.457	0.636346	0.692019	0.0342443
	2017	Belstar	300	10	30.922	2.35501	5.172	0.32866	1.27045	0.0494806
	2017	Belstar	450	10	10.047	1.92516	1.377	0.285424	1.82045	0.0665366
	2017	Chevalier	0	10	33.9	2.64928	5.961	0.614778	0.0355998	0.00299215
	2017	Chevalier	1.5	10	35.084	3.2071	6.8788	735.118	0.032889	0.00234982
	2017	Chevalier	15	10	37.973	3.27432	7.598	0.525225	0.0593023	0.00353283
	2017	Chevalier	150	10	41.577	2.03613	7.656	0.36694	0.625311	0.019351
	2017	Chevalier	300	10	29.281	2.55997	4.007	0.35356	1.40263	0.0884926
	2017	Chevalier	450	10	4.037	0.556978	0.394	0.104032	2.22522	0.0964031
	2017	Marathon F1	0	10	33.96	1.43041	6.932	0.41358	0.035403	0.00226826
	2017	Marathon F1	1.5	10	32.419	2.11227	5.784	0.587422	0.0313566	0.00258685
	2017	Marathon F1	15	10	35.852	3.01965	6.937	0.574058	0.0584099	0.00613035
	2017	Marathon F1	150	10	37.017	2.62392	6.887	0.527331	0.607992	0.0231133
	2017	Marathon F1	300	10	30.979	4.30294	4.25	0.648389	1.3581	0.0491685
	2017	Marathon F1	450	10	6.351	1.21017	0.741	0.195513	2.15327	0.110567
	2017	Waltham 29	0	10	31.612	1.84627	6.348	0.317419	0.0349203	0.00315154
	2017	Waltham 29	1.5	9	32.43	5.75617	5.37556	0.984401	0.0261433	0.002002
	2017	Waltham 29	15	9	39.7122	2.44941	6.70889	0.865704	0.0599744	0.0101084
	2017	Waltham 29	150	10	33.38	3.77354	6.008	0.638519	0.507669	0.0565501
	2017	Waltham 29	300	10	13.637	3.58368	1.953	0.690761	1.37598	0.0720899
	2017	Waltham 29	450	10	5.041	1.93748	0.486	0.208136	2.00703	0.148589
